# Supplementary material
Source: PubMed Central journal article supplement (PMC5384548)

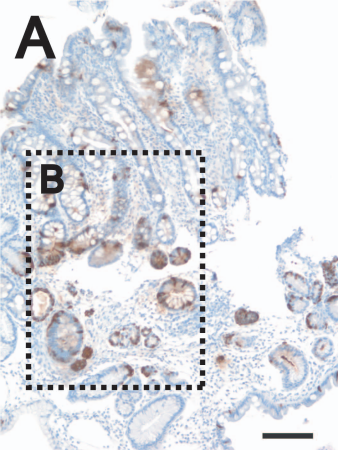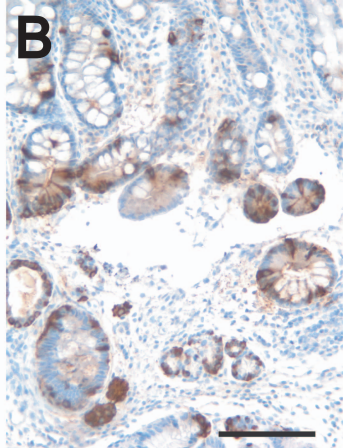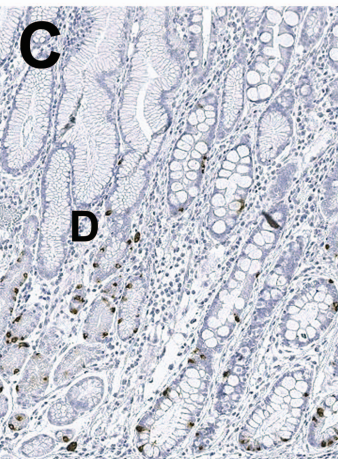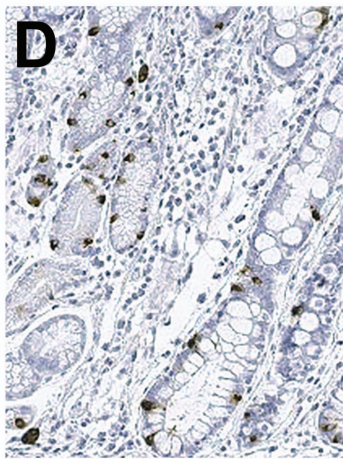

Supplement: supplement_figure_1_rev.pdf [file supplement_figure_1_rev.pdf]
